# Supplementary material for: Early Salmonella Typhimurium infection in pigs disrupts Microbiome composition and functionality principally at the ileum mucosa
Source: PubMed Central journal article supplement (PMC5958136; doi:10.1038/s41598-018-26083-3), 2018-05-17
Supplement: 41598_2018_26083_MOESM1_ESM.pdf [file 41598_2018_26083_MOESM1_ESM.pdf]

# **Early Salmonella Typhimurium infection in pigs disrupts Microbiome composition and functionality principally at the ileum mucosa.**

## **AUTHORS**

Héctor Argüello<sup>1\*</sup>, Jordi Estellé<sup>2</sup>, Sara Zaldívar-López<sup>1</sup>, Ángeles Jiménez-Marín<sup>1</sup>, Ana Carvajal<sup>3</sup>, M<sup>a</sup> Asunción López-Bascón<sup>4</sup>, Fiona Crispie<sup>5,6</sup>, Orla O'Sullivan<sup>5,6</sup>, Paul D. Cotter<sup>5,6</sup>, Feliciano Priego-Capote<sup>4</sup>, Luis Morera<sup>1</sup>, Juan J. Garrido<sup>1</sup>.

## **INSTITUTIONS**

<sup>1</sup>Grupo de Genómica y Mejora Animal, Departamento de Genética, Facultad de Veterinaria. Universidad de Córdoba, 14047, Córdoba, Spain.

<sup>2</sup>GABI, INRA, AgroParisTech, Université Paris-Saclay, 78350 Jouy-en-Josas, France.

<sup>3</sup>Departamento de Sanidad Animal, Facultad de Veterinaria, Universidad de León, 24071, León, Spain.

<sup>4</sup>Departamento de Química Analítica Universidad de Córdoba, Córdoba; CeIA3 Campus de Excelencia Agroalimentaria, Universidad de Córdoba, 14047, Córdoba, Spain.

<sup>5</sup>Teagasc, Food Research Centre, Moorepark, Fermoy, Co. Cork, Ireland.

<sup>6</sup>APC Microbiome Institute, Cork, Ireland.

## **EMAIL ADDRESSES:**

\* Corresponding author: Héctor Argüello: [ge2arroh@uco.es](mailto:ge2arroh@uco.es)

Figure S1a

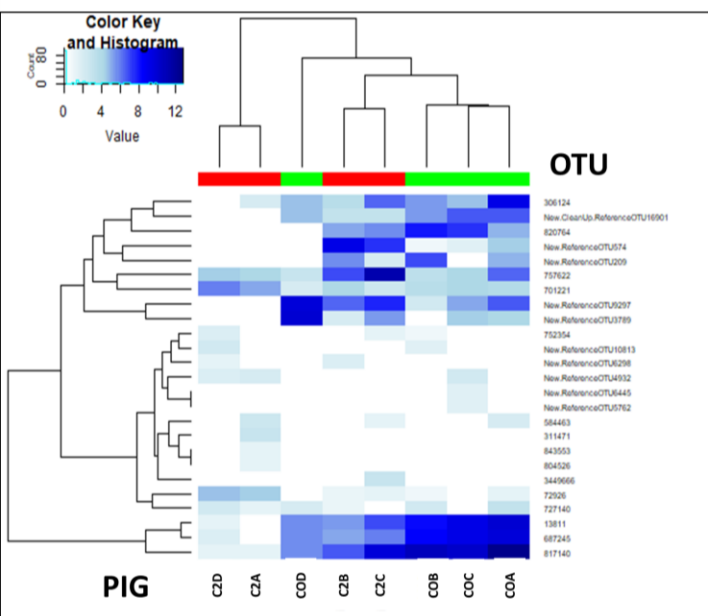

Figure S1b

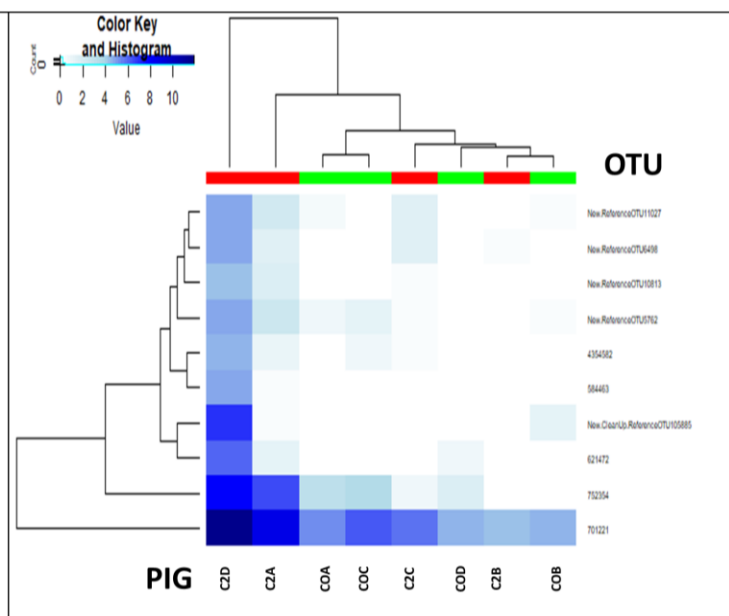

**Supplementary Figure S1. *Salmonella* Typhimurium infection affects the relative abundance of OTUs at the ileum content and faeces.** Heatmap illustrating the mean relative abundance of multiple OTUs at the ileum content (Figure S1a) and faeces (Figure S1b) of non-infected control pigs (green) and Day 2 p.i. infected pigs (red). White colour indicates low abundance while dark blue high values of abundance. Dendrogram was built using hierarchical cluster analysis with Bray-Curtis dissimilarity indices.

**S2a**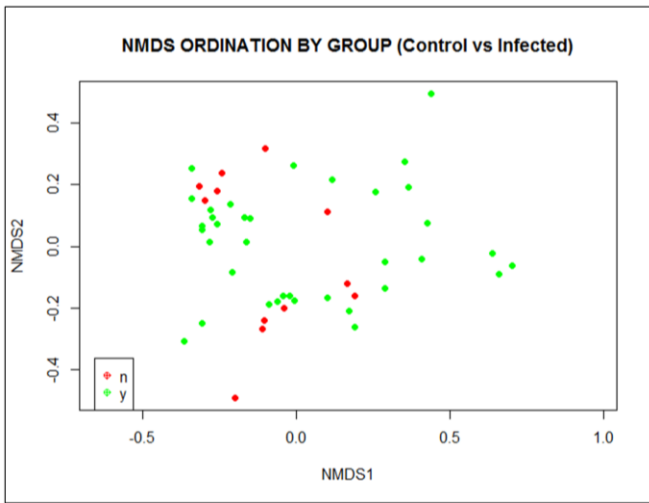**S2b**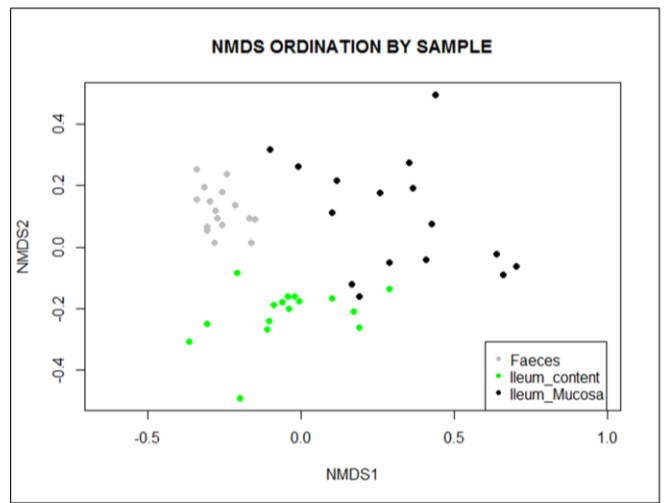

**Supplementary Figure S2. Ordination analysis of the functions predicted by (PICRUSt) in samples obtained through the time-course of a *S. Typhimurium* infection in pigs.** Figure S2A represents the ordination using Bray-Curtis dissimilarity index and plot by Non-metric Multidimensional Scaling (NMDS) of samples split by infection group. Figure S2B represent Bray-Curtis dissimilarity by NMDS of samples by type of sample factor.

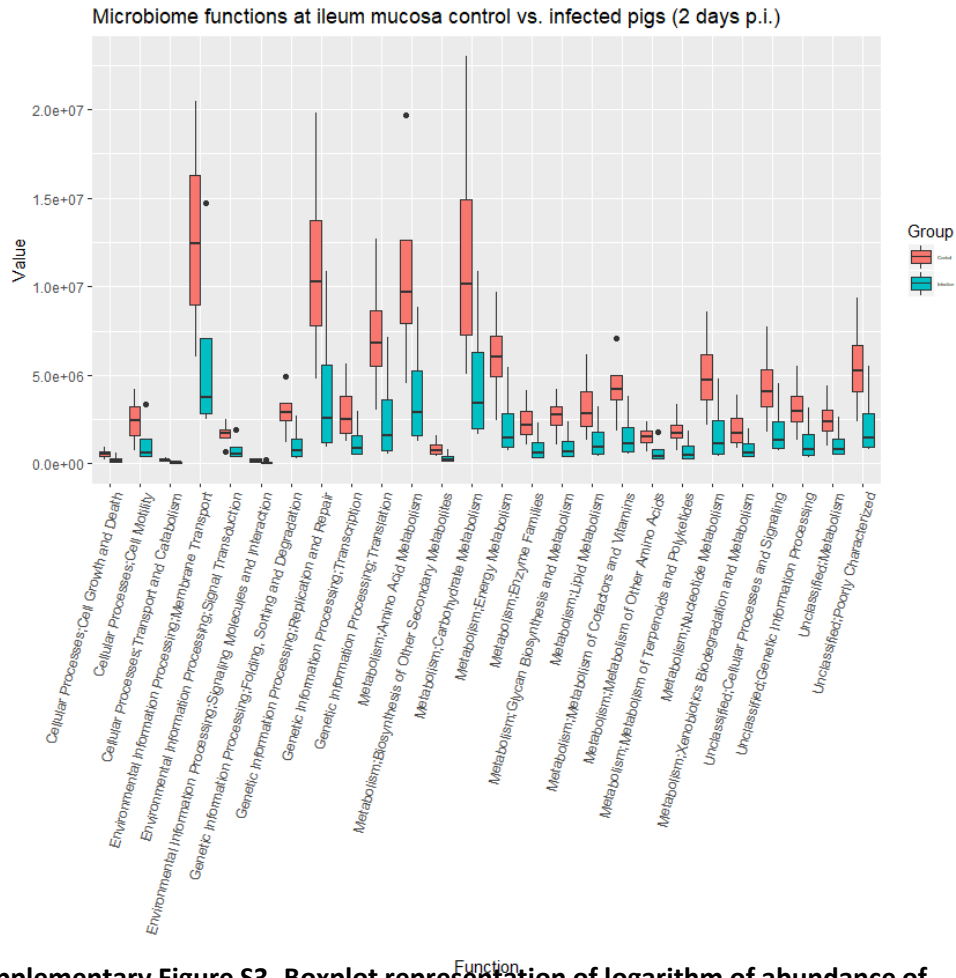

**Supplementary Figure S3. Boxplot representation of logarithm of abundance of detected KEGG level 2 functions in the ileum mucosa from control pigs (non-infected) and *S. Typhimurium* infected pigs at 2 days post infection. Significant differences are expressed by (\*) in those functions with a  $p < 0.05$ ).**
